# Supplementary material for: Knowledge, attitudes, and practices toward monkeypox among university health science students in Türkiye
Source: Research Square preprint supplement (doi:10.21203/rs.3.rs-6966852/v1), 2025-08-11
Supplement: Supplementary file 1 [file 2a10f4de0993c018a650b849.docx]

# Monkeypox KAP Survey

**Section 1: Sociodemographic Information**

1. What is your sex?
   - Female
   - Male
2. How old are you? (Please write):
   ……
3. Which faculty are you studying at?
   - Medicine
   - Dentistry
   - Pharmacy
   - Nursing
   - Other: ………………
4. What year are you in?
   ……
5. Do you have a healthcare worker in your family?
   - Yes
     - Profession: ……………
   - No

**Section 2: Knowledge Questions**

Please mark the option you think is correct.

| **No** |  | **True** | **False** | **Not sure** |
| --- | --- | --- | --- | --- |
| **1** | Mpox is a new infection that appeared in 2024. |  |  |  |
| **2** | Mpox is a viral infection. |  |  |  |
| **3** | Mpox is a bacterial infection. |  |  |  |
| **4** | Mpox is common in African countries. |  |  |  |
| **5** | There are many Mpox patients in our country. |  |  |  |
| **6** | Mpox can be transmitted from person to person through skin contact. |  |  |  |
| **7** | Mpox can be sexually transmitted from person to person. |  |  |  |
| **8** | Mpox can be transmitted to humans through direct contact with infected animals. |  |  |  |
| **9** | Mpox can be transmitted from person to person through droplets (coughing and sneezing). |  |  |  |
| **10** | Mpox can be transmitted through food. |  |  |  |
| **11** | Mpox and smallpox have similar symptoms. |  |  |  |
| **12** | Mpox and chickenpox have similar symptoms. |  |  |  |
| **13** | Mpox is associated with typical skin lesions. |  |  |  |
| **14** | Mpox can be transmitted from mother to infant during pregnancy. |  |  |  |
| **15** | People who are homosexual, bisexual or have multiple sexual partners are more at risk. |  |  |  |
| **16** | There is a vaccine for Mpox. |  |  |  |
| **17** | The smallpox vaccine can also be used for Mpox. |  |  |  |
| **18** | The chickenpox vaccine can also be used for Mpox. |  |  |  |
| **19** | People who have had Mpox are at risk of getting sick again. |  |  |  |
| **20** | There is a specific treatment for Mpox. |  |  |  |
| **21** | Antiviral drugs are necessary in the treatment of Mpox patients. |  |  |  |
| **22** | Antibiotic drugs are necessary in the treatment of Mpox patients. |  |  |  |

**Section 3: Attitude Questions**

Please indicate how much you agree with the following statements:

| **No** |  | Strongly agree | Agree | Not sure | Disagree | Strongly disagree |
| --- | --- | --- | --- | --- | --- | --- |
| **1** | Mpox is a severe disease |  |  |  |  |  |
| **2** | Mpox will affect everyday life |  |  |  |  |  |
| **3** | I believe that Mpox can be controlled worldwide |  |  |  |  |  |
| **4** | I would like to know more about Mpox |  |  |  |  |  |
| **5** | Mpox could burden the health systems of affected countries |  |  |  |  |  |
| **6** | I would avoid face-to-face contact with someone who has recently arrived from a country where Mpox is common |  |  |  |  |  |
| **7** | Travel to countries with Mpox should be restricted |  |  |  |  |  |
| **8** | Travel from countries with Mpox should be restricted |  |  |  |  |  |
| **9** | Media coverage of Mpox affects measures worldwide |  |  |  |  |  |
| **10** | It is dangerous to travel to countries where Mpox has been detected |  |  |  |  |  |
| **11** | I'm worried about catching Mpox |  |  |  |  |  |
| **12** | Mpox could turn into a pandemic like COVID-19 |  |  |  |  |  |
| **13** | I am considering vaccination to prevent Mpox. |  |  |  |  |  |
| **14** | There is no need to be vaccinated, as Mpox is mild. |  |  |  |  |  |
| **15** | I am concerned about possible side effects of the Mpox vaccine. |  |  |  |  |  |
| **16** | Health workers should be vaccinated against Mpox. |  |  |  |  |  |
| **17** | The Ministry of Health can successfully fight Mpox |  |  |  |  |  |

**Section 4: Behavior Questions**

Please indicate how much you agree with the following statements:

| **No** |  | Strongly agree | Agree | Not sure | Disagree | Strongly disagree |
| --- | --- | --- | --- | --- | --- | --- |
| **1** | I have been monitoring developments in relation to Mpox. |  |  |  |  |  |
| **2** | I took precautions against Mpox. |  |  |  |  |  |
| **3** | I changed my personal hygiene habits due to Mpox outbreak. |  |  |  |  |  |
| **4** | I use personal protective equipment to protect myself from Mpox. |  |  |  |  |  |
| **5** | I have changed my travel plans due to Mpox. |  |  |  |  |  |

**Section 5: Other Questions**

1. **Which sources do you use to follow the current developments about monkeypox?**
   (Multiple answers possible)

- I do not follow the news
- Academic journals
- Social media
- Television
- Social environment (family, friends)
- Official institutions
- Healthcare institutions
- Other: …………

1. **If you do not consider getting vaccinated against monkeypox, what are your reasons?**
   (Multiple answers possible)

- I am concerned about the side effects of the vaccine.
- I have doubts about the vaccine's effectiveness.
- I believe the disease will not spread in my country.
- I do not think I am at risk.
- I have a contraindication to vaccination.
- I was vaccinated against smallpox.
- Other: ………
