# Supplementary material for: Knowledge, attitudes, and practices toward monkeypox among university health science students in Türkiye
Source: Research Square preprint supplement (doi:10.21203/rs.3.rs-6966852/v1), 2025-08-11
Supplement: Supplementary file 2 [file b0701fb1123beb35201eafd8.docx]

# Supplementary Materials

Supplemental Table. Participants’ responses to the knowledge items, n (%)

| Knowledge Items | True | False | Not sure | Total |
| --- | --- | --- | --- | --- |
| Mpox is a new infection that appeared in 2024. | 677 (46.8) | 503 (34.8) | 266 (18.4) | 1,446 (100.0) |
| Mpox is a viral infection. | 1,131 (78.1) | 81 (5.6) | 237 (16.4) | 1,449 (100.0) |
| Mpox is a bacterial infection. | 826 (57.2) | 240 (16.4) | 378 (26.2) | 1,444 (100.0) |
| Mpox is common in African countries. | 1,133 (78.4) | 77 (5.3) | 235 (16.3) | 1,445 (100.0) |
| There are many Mpox patients in our country. | 669 (46.4) | 296 (20.5) | 476 (33.0) | 1,441 (100.0) |
| Mpox can be transmitted from person to person through skin contact. | 1,049 (72.7) | 138 (9.6) | 255 (17.7) | 1,442 (100.0) |
| Mpox can be sexually transmitted from person to person. | 852 (59.3) | 157 (10.9) | 427 (29.7) | 1,436 (100.0) |
| Mpox can be transmitted to humans through direct contact with infected animals. | 751 (52.2) | 176 (12.2) | 513 (35.6) | 1,440 (100.0) |
| Mpox can be transmitted from person to person through droplets (coughing and sneezing). | 263 (18.3) | 767 (53.2) | 411 (28.5) | 1,441 (100.0) |
| Mpox can be transmitted through food. | 439 (30.4) | 371 (25.7) | 633 (43.2) | 1,443 (100.0) |
| Mpox and smallpox have similar symptoms. | 732 (51.1) | 197 (13.7) | 504 (35.2) | 1,433 (100.0) |
| Mpox and chickenpox have similar symptoms. | 214 (14.9) | 644 (44.9) | 576 (40.2) | 1,434 (100.0) |
| Mpox is associated with typical skin lesions. | 930 (64.6) | 110 (7.6) | 400 (27.8) | 1,440 (100.0) |
| Mpox can be transmitted from mother to infant during pregnancy. | 423 (29.6) | 218 (15.3) | 787 (55.1) | 1,428 (100.0) |
| People who are homosexual, bisexual or have multiple sexual partners are more at risk. | 739 (51.4) | 182 (12.7) | 516 (35.9) | 1,437 (100.0) |
| There is a vaccine for Mpox. | 393 (27.3) | 465 (32.3) | 581 (40.4) | 1,439 (100.0) |
| The smallpox vaccine can also be used for Mpox. | 344 (23.9) | 496 (34.5) | 599 (41.6) | 1,439 (100.0) |
| The chickenpox vaccine can also be used for Mpox. | 571 (39.8) | 231 (16.1) | 631 (44.0) | 1,433 (100.0) |
| People who have had Mpox are at risk of getting sick again. | 565 (39.4) | 181 (12.6) | 688 (48.0) | 1,434 (100.0) |
| There is a specific treatment for Mpox. | 526 (36.6) | 174 (12.1) | 739 (51.4) | 1,439 (100.0) |
| Antiviral drugs are necessary in the treatment of Mpox patients. | 743 (51.5) | 125 (8.7) | 574 (39.8) | 1,442 (100.0) |
| Antibiotic drugs are necessary in the treatment of Mpox patients. | 637 (44.3) | 199 (13.8) | 603 (41.9) | 1,439 (100.0) |
